# Supplementary material for: Clinical validation of fully automated laminar knee cartilage transverse relaxation time (T2) analysis in anterior cruciate ligament (ACL)-injured knees— on behalf of the osteoarthritis (OA)-Bio consortium
Source: PubMed Central journal article supplement — Quant Imaging Med Surg. 2024 Jun 11;14(7):4319–32. doi: 10.21037/qims-24-194 (PMC11250285; doi:10.21037/qims-24-194), 2024-06-11
Supplement: qims-14-07-4319-coif.pdf [file qims-14-07-4319-coif.pdf]

## ICMJE DISCLOSURE FORM

**Date:** May 2, 2024  
**Your Name:** Felix Eckstein  
**Manuscript Title:** CLINICAL VALIDATION OF FULLY AUTOMATED LAMINAR KNEE CARTILAGE TRANSVERSE RELAXATION TIME (T2) ANALYSIS IN ACL-INJURED KNEES  
**Manuscript number:** 24-194

In the interest of transparency, we ask you to disclose all relationships/activities/interests listed below that are related to the content of your manuscript. "Related" means any relation with for-profit or not-for-profit third parties whose interests may be affected by the content of the manuscript. Disclosure represents a commitment to transparency and does not necessarily indicate a bias. If you are in doubt about whether to list a relationship/activity/interest, it is preferable that you do so.

The following questions apply to the author's relationships/activities/interests as they relate to the current manuscript only.

The author's relationships/activities/interests should be defined broadly. For example, if your manuscript pertains to the epidemiology of hypertension, you should declare all relationships with manufacturers of antihypertensive medication, even if that medication is not mentioned in the manuscript.

In item #1 below, report all support for the work reported in this manuscript without time limit. For all other items, the time frame for disclosure is the past 36 months.

|                                                           |                                                                                                                                                                                | Name all entities with whom you have this relationship or indicate none (add rows as needed) | Specifications/Comments (e.g., if payments were made to you or to your institution) |
|-----------------------------------------------------------|--------------------------------------------------------------------------------------------------------------------------------------------------------------------------------|----------------------------------------------------------------------------------------------|-------------------------------------------------------------------------------------|
| <b>Time frame: Since the initial planning of the work</b> |                                                                                                                                                                                |                                                                                              |                                                                                     |
| 1                                                         | All support for the present manuscript (e.g., funding, provision of study materials, medical writing, article processing charges, etc.)<br><b>No time limit for this item.</b> | Eurostars-2 program                                                                          | Research grant (grant ID: E! 114932)                                                |
|                                                           |                                                                                                                                                                                |                                                                                              |                                                                                     |
|                                                           |                                                                                                                                                                                |                                                                                              |                                                                                     |
|                                                           |                                                                                                                                                                                |                                                                                              |                                                                                     |
|                                                           |                                                                                                                                                                                |                                                                                              |                                                                                     |
|                                                           |                                                                                                                                                                                |                                                                                              |                                                                                     |
|                                                           |                                                                                                                                                                                |                                                                                              |                                                                                     |
| <b>Time frame: past 36 months</b>                         |                                                                                                                                                                                |                                                                                              |                                                                                     |
| 2                                                         | Grants or contracts from any entity (if not indicated in item #1 above).                                                                                                       | Merck KGA                                                                                    | Chondrometrics                                                                      |
|                                                           |                                                                                                                                                                                | Kolon Tissuegene                                                                             | Chondrometrics                                                                      |
|                                                           |                                                                                                                                                                                | Galapagos                                                                                    | Chondrometrics                                                                      |
|                                                           |                                                                                                                                                                                | Novartis                                                                                     | Chondrometrics                                                                      |
|                                                           |                                                                                                                                                                                | EU Horizon 2020                                                                              | Research grant (PROTO, grant agreement 101095635)                                   |
| 3                                                         | Royalties or licenses                                                                                                                                                          | None                                                                                         |                                                                                     |
|                                                           |                                                                                                                                                                                |                                                                                              |                                                                                     |
|                                                           |                                                                                                                                                                                |                                                                                              |                                                                                     |
| 4                                                         | Consulting fees                                                                                                                                                                | Merck KGA                                                                                    | me                                                                                  |

|    |                                                                                                              |                                         |            |
|----|--------------------------------------------------------------------------------------------------------------|-----------------------------------------|------------|
|    |                                                                                                              | Kolon Tissuegene                        | me         |
|    |                                                                                                              | Galapagos                               | me         |
|    |                                                                                                              | Novartis                                | me         |
|    |                                                                                                              | 4P Pharma                               | me         |
|    |                                                                                                              | Formation Bio                           | me         |
| 5  | Payment or honoraria for lectures, presentations, speakers bureaus, manuscript writing or educational events | ___ None                                |            |
| 6  | Payment for expert testimony                                                                                 | ___ None                                |            |
| 7  | Support for attending meetings and/or travel                                                                 | ___ None                                |            |
| 8  | Patents planned, issued or pending                                                                           | ___ None                                |            |
| 9  | Participation on a Data Safety Monitoring Board or Advisory Board                                            | Galapagos<br>4P Pharma<br>Formation Bio |            |
| 10 | Leadership or fiduciary role in other board, society, committee or advocacy group, paid or unpaid            | ___ None                                |            |
| 11 | Stock or stock options                                                                                       | Chondrometrics GmbH                     | Co-owner   |
| 12 | Receipt of equipment, materials, drugs, medical writing, gifts or other services                             | ___ None                                |            |
| 13 | Other financial or non-financial interests                                                                   | Chondrometrics GmbH                     | Employment |

**Please summarize the above conflict of interest in the following box:**

The author is an employee and co-owners of Chondrometrics GmbH. He has received grants or contracts from Merck KGA, Kolon Tissuegene, Galapagos, Novartis, and the European Union (EU). He has provided consulting services to Merck KGA, Kolon Tissue Gene, Galapagos, Novartis, 4P Pharma, and Formation Bio. He has participated in Data Safety Monitoring Boards of Galapagos, 4P Pharma and Formation Bio.

**Please place an "X" next to the following statement to indicate your agreement:**

**X / I certify that I have answered every question and have not altered the wording of any of the questions on this form.**

## ICMJE DISCLOSURE FORM

**Date:** May 2, 2024

**Your Name:** Nicholas Brisson

**Manuscript Title:** CLINICAL VALIDATION OF FULLY AUTOMATED LAMINAR KNEE CARTILAGE TRANSVERSE RELAXATION TIME (T2) ANALYSIS IN ACL-INJURED KNEES

**Manuscript number (if known):** 24-194

In the interest of transparency, we ask you to disclose all relationships/activities/interests listed below that are related to the content of your manuscript. "Related" means any relation with for-profit or not-for-profit third parties whose interests may be affected by the content of the manuscript. Disclosure represents a commitment to transparency and does not necessarily indicate a bias. If you are in doubt about whether to list a relationship/activity/interest, it is preferable that you do so.

The following questions apply to the author's relationships/activities/interests as they relate to the current manuscript only.

The author's relationships/activities/interests should be defined broadly. For example, if your manuscript pertains to the epidemiology of hypertension, you should declare all relationships with manufacturers of antihypertensive medication, even if that medication is not mentioned in the manuscript.

In item #1 below, report all support for the work reported in this manuscript without time limit. For all other items, the time frame for disclosure is the past 36 months.

|                                                           |                                                                                                                                                                                | Name all entities with whom you have this relationship or indicate none (add rows as needed) | Specifications/Comments (e.g., if payments were made to you or to your institution)                         |
|-----------------------------------------------------------|--------------------------------------------------------------------------------------------------------------------------------------------------------------------------------|----------------------------------------------------------------------------------------------|-------------------------------------------------------------------------------------------------------------|
| <b>Time frame: Since the initial planning of the work</b> |                                                                                                                                                                                |                                                                                              |                                                                                                             |
| 1                                                         | All support for the present manuscript (e.g., funding, provision of study materials, medical writing, article processing charges, etc.)<br><b>No time limit for this item.</b> | German Research Foundation (DFG - Deutsche Forschungsgemeinschaft)                           | I have received research funding from the German Research Foundation (Projects #BR 6698/1-1 & DU 298/25-1). |
|                                                           |                                                                                                                                                                                |                                                                                              |                                                                                                             |
|                                                           |                                                                                                                                                                                |                                                                                              |                                                                                                             |
|                                                           |                                                                                                                                                                                |                                                                                              |                                                                                                             |
|                                                           |                                                                                                                                                                                |                                                                                              |                                                                                                             |
|                                                           |                                                                                                                                                                                |                                                                                              |                                                                                                             |
|                                                           |                                                                                                                                                                                |                                                                                              |                                                                                                             |
| <b>Time frame: past 36 months</b>                         |                                                                                                                                                                                |                                                                                              |                                                                                                             |
| 2                                                         | Grants or contracts from any entity (if not indicated in item #1 above).                                                                                                       | Horizon Europe Framework Programme (HORIZON)                                                 | I have received research funding from the European Union under Grant Agreement Nr. 101095635 (PROTO).       |
|                                                           |                                                                                                                                                                                |                                                                                              |                                                                                                             |
|                                                           |                                                                                                                                                                                |                                                                                              |                                                                                                             |
| 3                                                         | Royalties or licenses                                                                                                                                                          | ___None                                                                                      |                                                                                                             |

|    |                                                                                                              |                 |                                                                                 |
|----|--------------------------------------------------------------------------------------------------------------|-----------------|---------------------------------------------------------------------------------|
|    |                                                                                                              |                 |                                                                                 |
| 4  | Consulting fees                                                                                              | ___ None        |                                                                                 |
| 5  | Payment or honoraria for lectures, presentations, speakers bureaus, manuscript writing or educational events | ___ None        |                                                                                 |
| 6  | Payment for expert testimony                                                                                 | ___ None        |                                                                                 |
| 7  | Support for attending meetings and/or travel                                                                 | ___ None        |                                                                                 |
| 8  | Patents planned, issued or pending                                                                           | ___ None        |                                                                                 |
| 9  | Participation on a Data Safety Monitoring Board or Advisory Board                                            | ___ None        |                                                                                 |
| 10 | Leadership or fiduciary role in other board, society, committee or advocacy group, paid or unpaid            | ___ None        |                                                                                 |
| 11 | Stock or stock options                                                                                       | ___ None        |                                                                                 |
| 12 | Receipt of equipment, materials, drugs, medical writing, gifts or other services                             | ___ None        |                                                                                 |
| 13 | Other financial or non-financial interests                                                                   | <i>OAC Open</i> | I have received honoraria for my role as Associate Editor for <i>OAC Open</i> . |

**Please summarize the above conflict of interest in the following box:**

The author has received grants from the German Research Foundation and the European Union. He has also received honoraria in his role as Associate Editor for *OAC Open*.

**Please place an "X" next to the following statement to indicate your agreement:**

**X I certify that I have answered every question and have not altered the wording of any of the questions on this form.**

## ICMJE DISCLOSURE FORM

**Date:** May 2, 2024  
**Your Name:** Susanne Maschek  
**Manuscript Title:** CLINICAL VALIDATION OF FULLY AUTOMATED LAMINAR KNEE CARTILAGE TRANSVERSE RELAXATION TIME (T2) ANALYSIS IN ACL-INJURED KNEES  
**Manuscript number:** 24-194

In the interest of transparency, we ask you to disclose all relationships/activities/interests listed below that are related to the content of your manuscript. "Related" means any relation with for-profit or not-for-profit third parties whose interests may be affected by the content of the manuscript. Disclosure represents a commitment to transparency and does not necessarily indicate a bias. If you are in doubt about whether to list a relationship/activity/interest, it is preferable that you do so.

The following questions apply to the author's relationships/activities/interests as they relate to the current manuscript only.

The author's relationships/activities/interests should be defined broadly. For example, if your manuscript pertains to the epidemiology of hypertension, you should declare all relationships with manufacturers of antihypertensive medication, even if that medication is not mentioned in the manuscript.

In item #1 below, report all support for the work reported in this manuscript without time limit. For all other items, the time frame for disclosure is the past 36 months.

|                                                           |                                                                                                                                                                                | Name all entities with whom you have this relationship or indicate none (add rows as needed) | Specifications/Comments (e.g., if payments were made to you or to your institution) |
|-----------------------------------------------------------|--------------------------------------------------------------------------------------------------------------------------------------------------------------------------------|----------------------------------------------------------------------------------------------|-------------------------------------------------------------------------------------|
| <b>Time frame: Since the initial planning of the work</b> |                                                                                                                                                                                |                                                                                              |                                                                                     |
| 1                                                         | All support for the present manuscript (e.g., funding, provision of study materials, medical writing, article processing charges, etc.)<br><b>No time limit for this item.</b> | ___ None                                                                                     |                                                                                     |
|                                                           |                                                                                                                                                                                |                                                                                              |                                                                                     |
|                                                           |                                                                                                                                                                                |                                                                                              |                                                                                     |
|                                                           |                                                                                                                                                                                |                                                                                              |                                                                                     |
|                                                           |                                                                                                                                                                                |                                                                                              |                                                                                     |
|                                                           |                                                                                                                                                                                |                                                                                              |                                                                                     |
| <b>Time frame: past 36 months</b>                         |                                                                                                                                                                                |                                                                                              |                                                                                     |
| 2                                                         | Grants or contracts from any entity (if not indicated in item #1 above).                                                                                                       | ___ None                                                                                     |                                                                                     |
|                                                           |                                                                                                                                                                                |                                                                                              |                                                                                     |
|                                                           |                                                                                                                                                                                |                                                                                              |                                                                                     |
| 3                                                         | Royalties or licenses                                                                                                                                                          | ___ None                                                                                     |                                                                                     |
|                                                           |                                                                                                                                                                                |                                                                                              |                                                                                     |
| 4                                                         | Consulting fees                                                                                                                                                                | ___ None                                                                                     |                                                                                     |

|    |                                                                                                              |                     |            |
|----|--------------------------------------------------------------------------------------------------------------|---------------------|------------|
|    |                                                                                                              |                     |            |
|    |                                                                                                              |                     |            |
|    |                                                                                                              |                     |            |
|    |                                                                                                              |                     |            |
| 5  | Payment or honoraria for lectures, presentations, speakers bureaus, manuscript writing or educational events | ___ None            |            |
| 6  | Payment for expert testimony                                                                                 | ___ None            |            |
| 7  | Support for attending meetings and/or travel                                                                 | ___ None            |            |
| 8  | Patents planned, issued or pending                                                                           | ___ None            |            |
| 9  | Participation on a Data Safety Monitoring Board or Advisory Board                                            | ___ None            |            |
| 10 | Leadership or fiduciary role in other board, society, committee or advocacy group, paid or unpaid            | ___ None            |            |
| 11 | Stock or stock options                                                                                       | Chondrometrics GmbH | Co-owner   |
| 12 | Receipt of equipment, materials, drugs, medical writing, gifts or other services                             | ___ None            |            |
| 13 | Other financial or non-financial interests                                                                   | Chondrometrics GmbH | Employment |

The author is an employee and co-owner of Chondrometrics GmbH

Please place an "X" next to the following statement to indicate your agreement:

X / I certify that I have answered every question and have not altered the wording of any of the questions on this form.

## ICMJE DISCLOSURE FORM

**Date:** May 2, 2024  
**Your Name:** Felix Eckstein  
**Manuscript Title:** CLINICAL VALIDATION OF FULLY AUTOMATED LAMINAR KNEE CARTILAGE TRANSVERSE RELAXATION TIME (T2) ANALYSIS IN ACL-INJURED KNEES  
**Manuscript number:** 24-194

In the interest of transparency, we ask you to disclose all relationships/activities/interests listed below that are related to the content of your manuscript. "Related" means any relation with for-profit or not-for-profit third parties whose interests may be affected by the content of the manuscript. Disclosure represents a commitment to transparency and does not necessarily indicate a bias. If you are in doubt about whether to list a relationship/activity/interest, it is preferable that you do so.

The following questions apply to the author's relationships/activities/interests as they relate to the current manuscript only.

The author's relationships/activities/interests should be defined broadly. For example, if your manuscript pertains to the epidemiology of hypertension, you should declare all relationships with manufacturers of antihypertensive medication, even if that medication is not mentioned in the manuscript.

In item #1 below, report all support for the work reported in this manuscript without time limit. For all other items, the time frame for disclosure is the past 36 months.

|                                                           |                                                                                                                                                                                | Name all entities with whom you have this relationship or indicate none (add rows as needed) | Specifications/Comments (e.g., if payments were made to you or to your institution) |
|-----------------------------------------------------------|--------------------------------------------------------------------------------------------------------------------------------------------------------------------------------|----------------------------------------------------------------------------------------------|-------------------------------------------------------------------------------------|
| <b>Time frame: Since the initial planning of the work</b> |                                                                                                                                                                                |                                                                                              |                                                                                     |
| 1                                                         | All support for the present manuscript (e.g., funding, provision of study materials, medical writing, article processing charges, etc.)<br><b>No time limit for this item.</b> | ___ None                                                                                     |                                                                                     |
|                                                           |                                                                                                                                                                                |                                                                                              |                                                                                     |
|                                                           |                                                                                                                                                                                |                                                                                              |                                                                                     |
|                                                           |                                                                                                                                                                                |                                                                                              |                                                                                     |
|                                                           |                                                                                                                                                                                |                                                                                              |                                                                                     |
|                                                           |                                                                                                                                                                                |                                                                                              |                                                                                     |
| <b>Time frame: past 36 months</b>                         |                                                                                                                                                                                |                                                                                              |                                                                                     |
| 2                                                         | Grants or contracts from any entity (if not indicated in item #1 above).                                                                                                       | ___ None                                                                                     |                                                                                     |
|                                                           |                                                                                                                                                                                |                                                                                              |                                                                                     |
|                                                           |                                                                                                                                                                                |                                                                                              |                                                                                     |
| 3                                                         | Royalties or licenses                                                                                                                                                          | ___ None                                                                                     |                                                                                     |
|                                                           |                                                                                                                                                                                |                                                                                              |                                                                                     |
|                                                           |                                                                                                                                                                                |                                                                                              |                                                                                     |
| 4                                                         | Consulting fees                                                                                                                                                                | ___ None                                                                                     |                                                                                     |

|    |                                                                                                              |                     |            |
|----|--------------------------------------------------------------------------------------------------------------|---------------------|------------|
|    |                                                                                                              |                     |            |
|    |                                                                                                              |                     |            |
|    |                                                                                                              |                     |            |
|    |                                                                                                              |                     |            |
| 5  | Payment or honoraria for lectures, presentations, speakers bureaus, manuscript writing or educational events | ___ None            |            |
| 6  | Payment for expert testimony                                                                                 | ___ None            |            |
| 7  | Support for attending meetings and/or travel                                                                 | ___ None            |            |
| 8  | Patents planned, issued or pending                                                                           | ___ None            |            |
| 9  | Participation on a Data Safety Monitoring Board or Advisory Board                                            | ___ None            |            |
| 10 | Leadership or fiduciary role in other board, society, committee or advocacy group, paid or unpaid            | ___ None            |            |
| 11 | Stock or stock options                                                                                       | ___ None            |            |
| 12 | Receipt of equipment, materials, drugs, medical writing, gifts or other services                             | ___ None            |            |
| 13 | Other financial or non-financial interests                                                                   | Chondrometrics GmbH | Employment |

The author is an employee of Chondrometrics GmbH

Please place an "X" next to the following statement to indicate your agreement:

X / I certify that I have answered every question and have not altered the wording of any of the questions on this form.



## ICMJE DISCLOSURE FORM

**Date:** May 2, 2024  
**Your Name:** Francis Berenbaum  
**Manuscript Title:** CLINICAL VALIDATION OF FULLY AUTOMATED LAMINAR KNEE CARTILAGE TRANSVERSE RELAXATION TIME (T2) ANALYSIS IN ACL-INJURED KNEES  
**Manuscript number:** 24-194

In the interest of transparency, we ask you to disclose all relationships/activities/interests listed below that are related to the content of your manuscript. "Related" means any relation with for-profit or not-for-profit third parties whose interests may be affected by the content of the manuscript. Disclosure represents a commitment to transparency and does not necessarily indicate a bias. If you are in doubt about whether to list a relationship/activity/interest, it is preferable that you do so.

The following questions apply to the author's relationships/activities/interests as they relate to the current manuscript only.

The author's relationships/activities/interests should be defined broadly. For example, if your manuscript pertains to the epidemiology of hypertension, you should declare all relationships with manufacturers of antihypertensive medication, even if that medication is not mentioned in the manuscript.

In item #1 below, report all support for the work reported in this manuscript without time limit. For all other items, the time frame for disclosure is the past 36 months.

|                                                           |                                                                                                                                                                                | Name all entities with whom you have this relationship or indicate none (add rows as needed) | Specifications/Comments (e.g., if payments were made to you or to your institution) |
|-----------------------------------------------------------|--------------------------------------------------------------------------------------------------------------------------------------------------------------------------------|----------------------------------------------------------------------------------------------|-------------------------------------------------------------------------------------|
| <b>Time frame: Since the initial planning of the work</b> |                                                                                                                                                                                |                                                                                              |                                                                                     |
| 1                                                         | All support for the present manuscript (e.g., funding, provision of study materials, medical writing, article processing charges, etc.)<br><b>No time limit for this item.</b> | None                                                                                         |                                                                                     |
|                                                           |                                                                                                                                                                                |                                                                                              |                                                                                     |
|                                                           |                                                                                                                                                                                |                                                                                              |                                                                                     |
|                                                           |                                                                                                                                                                                |                                                                                              |                                                                                     |
|                                                           |                                                                                                                                                                                |                                                                                              |                                                                                     |
|                                                           |                                                                                                                                                                                |                                                                                              |                                                                                     |
| <b>Time frame: past 36 months</b>                         |                                                                                                                                                                                |                                                                                              |                                                                                     |
| 2                                                         | Grants or contracts from any entity (if not indicated in item #1 above).                                                                                                       | None                                                                                         |                                                                                     |
|                                                           |                                                                                                                                                                                |                                                                                              |                                                                                     |
| 3                                                         | Royalties or licenses                                                                                                                                                          | None                                                                                         |                                                                                     |
|                                                           |                                                                                                                                                                                |                                                                                              |                                                                                     |
| 4                                                         | Consulting fees                                                                                                                                                                | 4P Parma, Grunenthal, GSK, Eli Lilly, Heel, Astra                                            |                                                                                     |

|    |                                                                                                              |                                                                             |  |
|----|--------------------------------------------------------------------------------------------------------------|-----------------------------------------------------------------------------|--|
|    |                                                                                                              | Zenneca, Diffusion Rx, Nordic Bioscience, Novartis, Pfizer, Servier, Zoetis |  |
|    |                                                                                                              |                                                                             |  |
| 5  | Payment or honoraria for lectures, presentations, speakers bureaus, manuscript writing or educational events | Viartis, Pfizer                                                             |  |
|    |                                                                                                              |                                                                             |  |
| 6  | Payment for expert testimony                                                                                 | None                                                                        |  |
|    |                                                                                                              |                                                                             |  |
| 7  | Support for attending meetings and/or travel                                                                 | Nordic Pharma                                                               |  |
|    |                                                                                                              |                                                                             |  |
| 8  | Patents planned, issued or pending                                                                           | 4Moving Biotech                                                             |  |
|    |                                                                                                              |                                                                             |  |
| 9  | Participation on a Data Safety Monitoring Board or Advisory Board                                            | AstraZeneca, Sun Pharma, Nordic Bioscience                                  |  |
|    |                                                                                                              |                                                                             |  |
| 10 | Leadership or fiduciary role in other board, society, committee or advocacy group, paid or unpaid            | None                                                                        |  |
|    |                                                                                                              |                                                                             |  |
| 11 | Stock or stock options                                                                                       | 4P Pharma<br>4Moving Biotech                                                |  |
|    |                                                                                                              |                                                                             |  |
| 12 | Receipt of equipment, materials, drugs, medical writing, gifts or other services                             | None                                                                        |  |
|    |                                                                                                              |                                                                             |  |
| 13 | Other financial or non-financial interests                                                                   | None                                                                        |  |
|    |                                                                                                              |                                                                             |  |

The author has received consulting fees from 4P Pharma, Grunenthal, GSK, Eli Lilly, Heel, AstraZeneca, Diffusion Rx, Nordic Bioscience, Novartis, Pfizer, Servier, Zoetis, and Viartis. He has participated in data safety monitoring boards of AstraZeneca, Sun Pharma and Nordic Bioscience. He owns stocks or stock options of 4P Pharma and 4Moving Biotech.

Please place an "X" next to the following statement to indicate your agreement:

I certify that I have answered every question and have not altered the wording of any of the questions on this form.

## ICMJE DISCLOSURE FORM

**Date:** May 2, 2024  
**Your Name:** Georg Duda  
**Manuscript Title:** CLINICAL VALIDATION OF FULLY AUTOMATED LAMINAR KNEE CARTILAGE TRANSVERSE RELAXATION TIME (T2) ANALYSIS IN ACL-INJURED KNEES  
**Manuscript number:** 24-194

In the interest of transparency, we ask you to disclose all relationships/activities/interests listed below that are related to the content of your manuscript. "Related" means any relation with for-profit or not-for-profit third parties whose interests may be affected by the content of the manuscript. Disclosure represents a commitment to transparency and does not necessarily indicate a bias. If you are in doubt about whether to list a relationship/activity/interest, it is preferable that you do so.

The following questions apply to the author's relationships/activities/interests as they relate to the current manuscript only.

The author's relationships/activities/interests should be defined broadly. For example, if your manuscript pertains to the epidemiology of hypertension, you should declare all relationships with manufacturers of antihypertensive medication, even if that medication is not mentioned in the manuscript.

In item #1 below, report all support for the work reported in this manuscript without time limit. For all other items, the time frame for disclosure is the past 36 months.

|                                                           |                                                                                                                                                                                | Name all entities with whom you have this relationship or indicate none (add rows as needed) | Specifications/Comments (e.g., if payments were made to you or to your institution) |
|-----------------------------------------------------------|--------------------------------------------------------------------------------------------------------------------------------------------------------------------------------|----------------------------------------------------------------------------------------------|-------------------------------------------------------------------------------------|
| <b>Time frame: Since the initial planning of the work</b> |                                                                                                                                                                                |                                                                                              |                                                                                     |
| 1                                                         | All support for the present manuscript (e.g., funding, provision of study materials, medical writing, article processing charges, etc.)<br><b>No time limit for this item.</b> | ___ None                                                                                     |                                                                                     |
|                                                           |                                                                                                                                                                                |                                                                                              |                                                                                     |
|                                                           |                                                                                                                                                                                |                                                                                              |                                                                                     |
|                                                           |                                                                                                                                                                                |                                                                                              |                                                                                     |
|                                                           |                                                                                                                                                                                |                                                                                              |                                                                                     |
|                                                           |                                                                                                                                                                                |                                                                                              |                                                                                     |
| <b>Time frame: past 36 months</b>                         |                                                                                                                                                                                |                                                                                              |                                                                                     |
| 2                                                         | Grants or contracts from any entity (if not indicated in item #1 above).                                                                                                       | EU Grant                                                                                     | Charité and BIH                                                                     |
|                                                           |                                                                                                                                                                                |                                                                                              |                                                                                     |
|                                                           |                                                                                                                                                                                |                                                                                              |                                                                                     |
| 3                                                         | Royalties or licenses                                                                                                                                                          | ___ None                                                                                     |                                                                                     |
|                                                           |                                                                                                                                                                                |                                                                                              |                                                                                     |
|                                                           |                                                                                                                                                                                |                                                                                              |                                                                                     |
| 4                                                         | Consulting fees                                                                                                                                                                | ___ None                                                                                     |                                                                                     |

|    |                                                                                                              |                    |  |
|----|--------------------------------------------------------------------------------------------------------------|--------------------|--|
|    |                                                                                                              |                    |  |
|    |                                                                                                              |                    |  |
|    |                                                                                                              |                    |  |
|    |                                                                                                              |                    |  |
| 5  | Payment or honoraria for lectures, presentations, speakers bureaus, manuscript writing or educational events | <u>      </u> None |  |
|    |                                                                                                              |                    |  |
|    |                                                                                                              |                    |  |
| 6  | Payment for expert testimony                                                                                 | <u>      </u> None |  |
|    |                                                                                                              |                    |  |
|    |                                                                                                              |                    |  |
| 7  | Support for attending meetings and/or travel                                                                 | <u>      </u> None |  |
|    |                                                                                                              |                    |  |
|    |                                                                                                              |                    |  |
| 8  | Patents planned, issued or pending                                                                           | <u>      </u> None |  |
|    |                                                                                                              |                    |  |
|    |                                                                                                              |                    |  |
| 9  | Participation on a Data Safety Monitoring Board or Advisory Board                                            | <u>      </u> None |  |
|    |                                                                                                              |                    |  |
|    |                                                                                                              |                    |  |
| 10 | Leadership or fiduciary role in other board, society, committee or advocacy group, paid or unpaid            | <u>      </u> None |  |
|    |                                                                                                              |                    |  |
|    |                                                                                                              |                    |  |
| 11 | Stock or stock options                                                                                       | <u>      </u> None |  |
|    |                                                                                                              |                    |  |
|    |                                                                                                              |                    |  |
| 12 | Receipt of equipment, materials, drugs, medical writing, gifts or other services                             | <u>      </u> None |  |
|    |                                                                                                              |                    |  |
|    |                                                                                                              |                    |  |
| 13 | Other financial or non-financial interests                                                                   | <u>      </u> None |  |
|    |                                                                                                              |                    |  |
|    |                                                                                                              |                    |  |

The author has received funding from the European Union.

Please place an "X" next to the following statement to indicate your agreement:

**X / I certify that I have answered every question and have not altered the wording of any of the questions on this form.**

## ICMJE DISCLOSURE FORM

**Date:** May 2, 2024  
**Your Name:** Wolfgang Wirth  
**Manuscript Title:** CLINICAL VALIDATION OF FULLY AUTOMATED LAMINAR KNEE CARTILAGE TRANSVERSE RELAXATION TIME (T2) ANALYSIS IN ACL-INJURED KNEES  
**Manuscript number:** 24-194

In the interest of transparency, we ask you to disclose all relationships/activities/interests listed below that are related to the content of your manuscript. "Related" means any relation with for-profit or not-for-profit third parties whose interests may be affected by the content of the manuscript. Disclosure represents a commitment to transparency and does not necessarily indicate a bias. If you are in doubt about whether to list a relationship/activity/interest, it is preferable that you do so.

The following questions apply to the author's relationships/activities/interests as they relate to the current manuscript only.

The author's relationships/activities/interests should be defined broadly. For example, if your manuscript pertains to the epidemiology of hypertension, you should declare all relationships with manufacturers of antihypertensive medication, even if that medication is not mentioned in the manuscript.

In item #1 below, report all support for the work reported in this manuscript without time limit. For all other items, the time frame for disclosure is the past 36 months.

|                                                           |                                                                                                                                                                                | Name all entities with whom you have this relationship or indicate none (add rows as needed) | Specifications/Comments (e.g., if payments were made to you or to your institution) |
|-----------------------------------------------------------|--------------------------------------------------------------------------------------------------------------------------------------------------------------------------------|----------------------------------------------------------------------------------------------|-------------------------------------------------------------------------------------|
| <b>Time frame: Since the initial planning of the work</b> |                                                                                                                                                                                |                                                                                              |                                                                                     |
| 1                                                         | All support for the present manuscript (e.g., funding, provision of study materials, medical writing, article processing charges, etc.)<br><b>No time limit for this item.</b> | Eurostars-2 program                                                                          | Research grant (grant ID: E! 114932)                                                |
|                                                           |                                                                                                                                                                                |                                                                                              |                                                                                     |
|                                                           |                                                                                                                                                                                |                                                                                              |                                                                                     |
|                                                           |                                                                                                                                                                                |                                                                                              |                                                                                     |
|                                                           |                                                                                                                                                                                |                                                                                              |                                                                                     |
|                                                           |                                                                                                                                                                                |                                                                                              |                                                                                     |
| <b>Time frame: past 36 months</b>                         |                                                                                                                                                                                |                                                                                              |                                                                                     |
| 2                                                         | Grants or contracts from any entity (if not indicated in item #1 above).                                                                                                       | EU Horizon 2020                                                                              | Research grant (PROTO, grant agreement 101095635)                                   |
|                                                           |                                                                                                                                                                                |                                                                                              |                                                                                     |
| 3                                                         | Royalties or licenses                                                                                                                                                          | None                                                                                         |                                                                                     |
|                                                           |                                                                                                                                                                                |                                                                                              |                                                                                     |
| 4                                                         | Consulting fees                                                                                                                                                                | None                                                                                         |                                                                                     |
|                                                           |                                                                                                                                                                                |                                                                                              |                                                                                     |

|    |                                                                                                              |                     |              |
|----|--------------------------------------------------------------------------------------------------------------|---------------------|--------------|
| 5  | Payment or honoraria for lectures, presentations, speakers bureaus, manuscript writing or educational events | ___ None            |              |
|    |                                                                                                              |                     |              |
|    |                                                                                                              |                     |              |
| 6  | Payment for expert testimony                                                                                 | ___ None            |              |
|    |                                                                                                              |                     |              |
|    |                                                                                                              |                     |              |
| 7  | Support for attending meetings and/or travel                                                                 | ___ None            |              |
|    |                                                                                                              |                     |              |
|    |                                                                                                              |                     |              |
| 8  | Patents planned, issued or pending                                                                           | ___ None            |              |
|    |                                                                                                              |                     |              |
|    |                                                                                                              |                     |              |
| 9  | Participation on a Data Safety Monitoring Board or Advisory Board                                            | ___ None            |              |
|    |                                                                                                              |                     |              |
|    |                                                                                                              |                     |              |
| 10 | Leadership or fiduciary role in other board, society, committee or advocacy group, paid or unpaid            | ___ None            |              |
|    |                                                                                                              |                     |              |
|    |                                                                                                              |                     |              |
| 11 | Stock or stock options                                                                                       | Chondrometrics GmbH | Share-holder |
|    |                                                                                                              |                     |              |
|    |                                                                                                              |                     |              |
| 12 | Receipt of equipment, materials, drugs, medical writing, gifts or other services                             | ___ None            |              |
|    |                                                                                                              |                     |              |
|    |                                                                                                              |                     |              |
| 13 | Other financial or non-financial interests                                                                   | Chondrometrics GmbH | Employment   |
|    |                                                                                                              |                     |              |
|    |                                                                                                              |                     |              |

The author is an employee and co-owner of Chondrometrics GmbH

**Please place an "X" next to the following statement to indicate your agreement:**

**X / I certify that I have answered every question and have not altered the wording of any of the questions on this form.**
